# Supplementary material for: Understanding fluorometric interactions in ion-responsive sustainable polymer nanocomposite scaffolds
Source: Royal Society of Chemistry journal article supplement (doi:10.1039/d0sm00965b), 2020-01-01
Supplement: d0sm00965b1.pdf [file d0sm00965b1.pdf]

## Understanding Fluorometric Interactions in Ion-Responsive Sustainable Polymer Nanocomposite Scaffolds

Shriram Janghela<sup>a,b</sup>, Sudeepa Devi<sup>a</sup>, Neelu Kambo<sup>b</sup>, Debmalya Roy<sup>a\*</sup>, N. Eswara Prasad<sup>c</sup>

<sup>a</sup>. Directorate of Nanomaterials and Technologies, DMSRDE, GT Road, Kanpur, India-13

<sup>b</sup>. DMSRDE, GT Road, Kanpur, India-208013.

### Data sheets-PU & PAN

| Typical Properties*<br>For Natural Resin       | ASTM<br>Test Method<br>(Other) | Units                |              | Texin SUN-3006       |              |
|------------------------------------------------|--------------------------------|----------------------|--------------|----------------------|--------------|
|                                                |                                | U.S.<br>Conventional | SI<br>Metric | U.S.<br>Conventional | SI<br>Metric |
| <b>General</b>                                 |                                |                      |              |                      |              |
| Specific Gravity                               | D 792 (ISO 1183)               |                      |              | 1.08                 |              |
| Shore Hardness                                 | D 2240 (ISO 868)               | A Scale              |              | 90                   |              |
| Mold Shrinkage at 100-mil Thickness:           | D 955 (ISO 2577)               |                      |              |                      |              |
| Flow Direction                                 |                                | in/in (mm/mm)        |              | 0.008                |              |
| Cross-Flow Direction                           |                                | in/in (mm/mm)        |              | 0.008                |              |
| Water Absorption                               | D 570 (ISO 62)                 | %                    |              | 1.3                  |              |
| Light Transmission (350-1050 nm)               | D 1003 (ISO 3538)              | %                    |              | 92.8                 |              |
| Refractive Index                               | D 542 (ISO 489)                |                      |              | 1.503                |              |
| <b>Mechanical</b>                              |                                |                      |              |                      |              |
| Tensile Strength                               | D 882                          | lb/in <sup>2</sup>   | MPa          | 4,100                | 28.3         |
| Ultimate Elongation                            | D 882                          | %                    |              | 370                  |              |
| Tear Strength, Die "C"                         | D 1004                         | lbf/in               | kN/m         | 440                  | 95           |
| <b>Thermal</b>                                 |                                |                      |              |                      |              |
| Glass Transition Temperature (T <sub>g</sub> ) | (DMA) <sup>a</sup>             | °F                   | °C           | -40                  | -40          |
| Softening Temperature                          | (TMA) <sup>b</sup>             | °F                   | °C           | 228                  | 109          |

\*These values are provided as general information only. They are approximate values and are not part of the product specifications.  
<sup>a</sup> Dynamic Mechanical Analysis  
<sup>b</sup> Thermal Mechanical Analysis

---

**SIGMA-ALDRICH** sigma-aldrich.com

3050 Spruce Street, Saint Louis, MO 63103, USA  
 Website: www.sigmaaldrich.com  
 Email USA: techserv@sial.com  
 Outside USA: eurtechserv@sial.com

### Product Specification

Product Name:  
Polyacrylonitrile - average Mw 150,000 (Typical)

Product Number: 181315  
 CAS Number: 25014-41-9  
 MDL: MFCD00084395  
 Formula: C<sub>3</sub>H<sub>3</sub>N

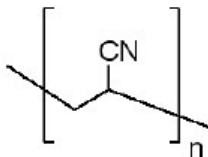

| TEST               | Specification            |
|--------------------|--------------------------|
| Appearance (Color) | White to Yellow          |
| Appearance (Form)  | Conforms to Requirements |
| Powder and Chunks  |                          |
| Infrared spectrum  | Conforms to Structure    |

Fig S1: The data sheet of Texin SUN 3006 polyurethane (upper) and polyacrylonitrile (lower) provided by Covestro, India and Sigma Aldrich respectively.

## Schematic and representative images of different low dimensional carbonaceous nanomaterials

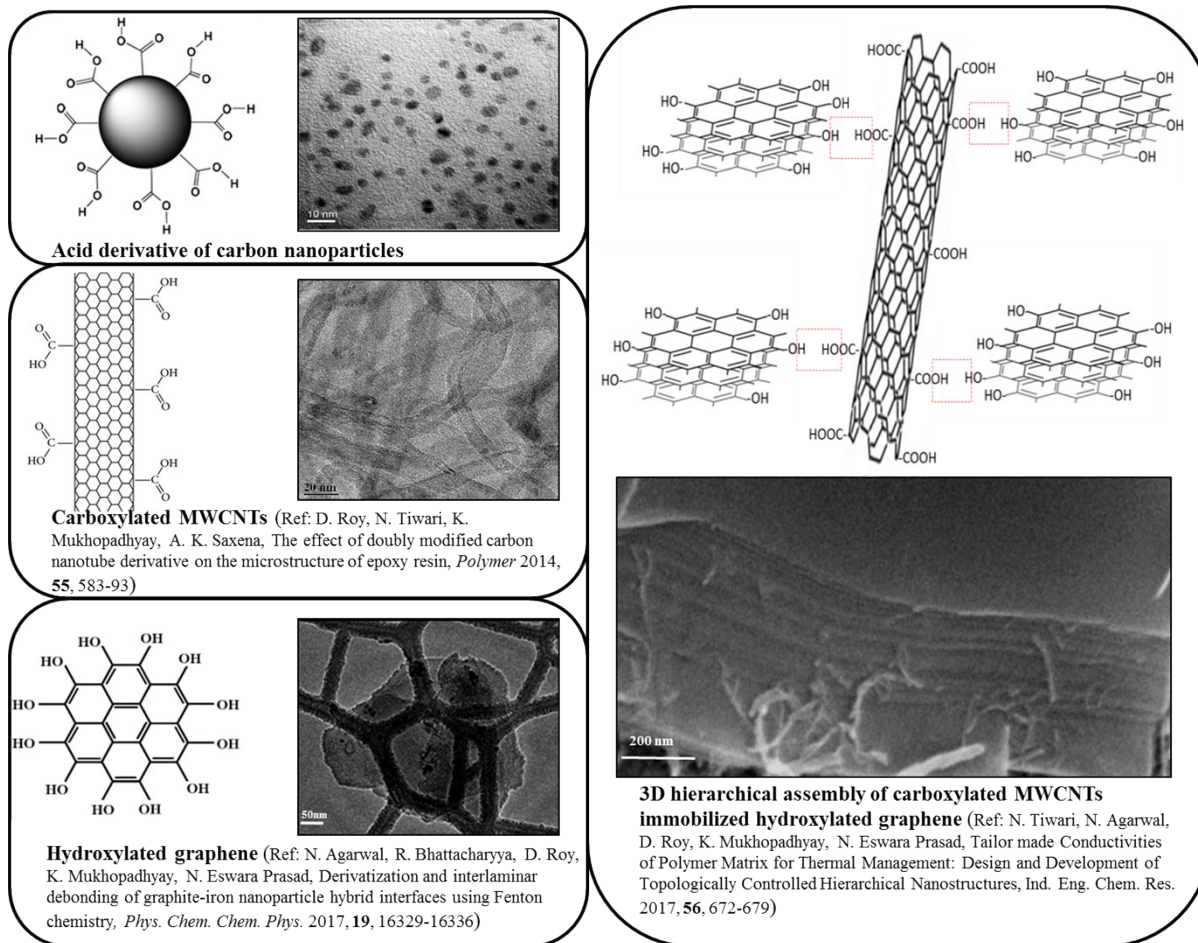

Fig S2: Schematic representation of different low dimensional functional carbon-based nanomaterials selected in this study.

**Fluorescence images of before and after dichromate treatment of pristine and nanocomposite of polyurethane and polyacrylonitrile**

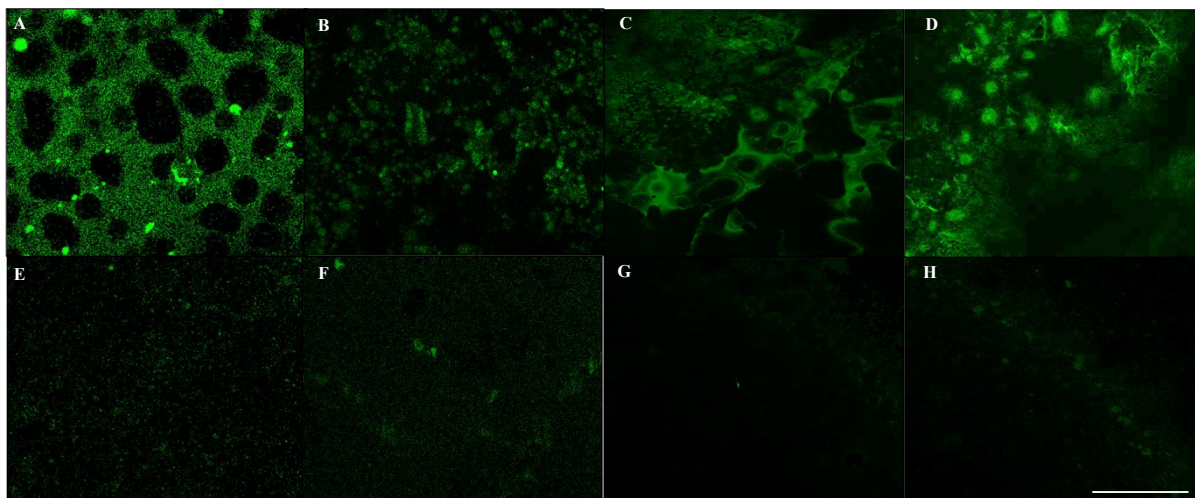

Fig S3: Fluorescence images of before (A, C & E, H) and after (B, D & F, H) metal ions treatment in pristine TPU (C, D), nanocomposite TPU (A, B), pristine PAN (G, H) and nanocomposite PAN (E, F) respectively. The samples were dried and fixed on a glass slide with a drop of epoxy glue and viewed under a epi-fluorescence microscope by excitation at 488 nm where the scale bar is 50  $\mu\text{m}$ .

## Dynamic Mechanical Analysis studies of PU and PU nanocomposite of 01 weight percentage of hybrid nanofillers

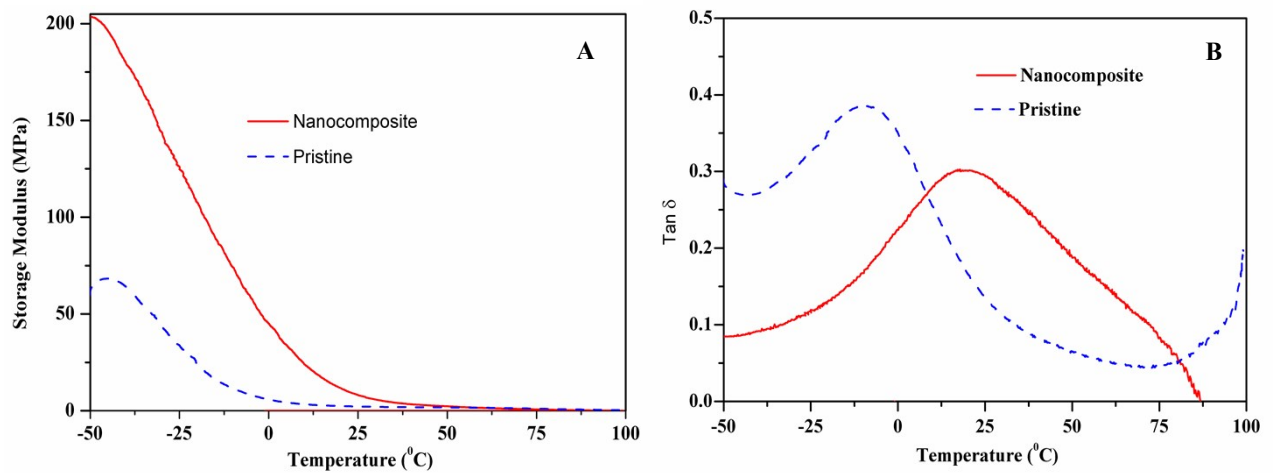

Fig S4: Dynamic Mechanical Analysis (DMA) studies of storage modulus (A) and glass transition temperature (B) of polyurethane matrix (blue dashed line) by addition of 01 weight percentage of hybrid nanofillers (red solid line) from -50 to 100°C in tension mode with an oscillatory frequency of 1 Hz at a heating rate of 05°C/min.

**Transmission Electron Microscopy (TEM) images of pristine Polyurethane**

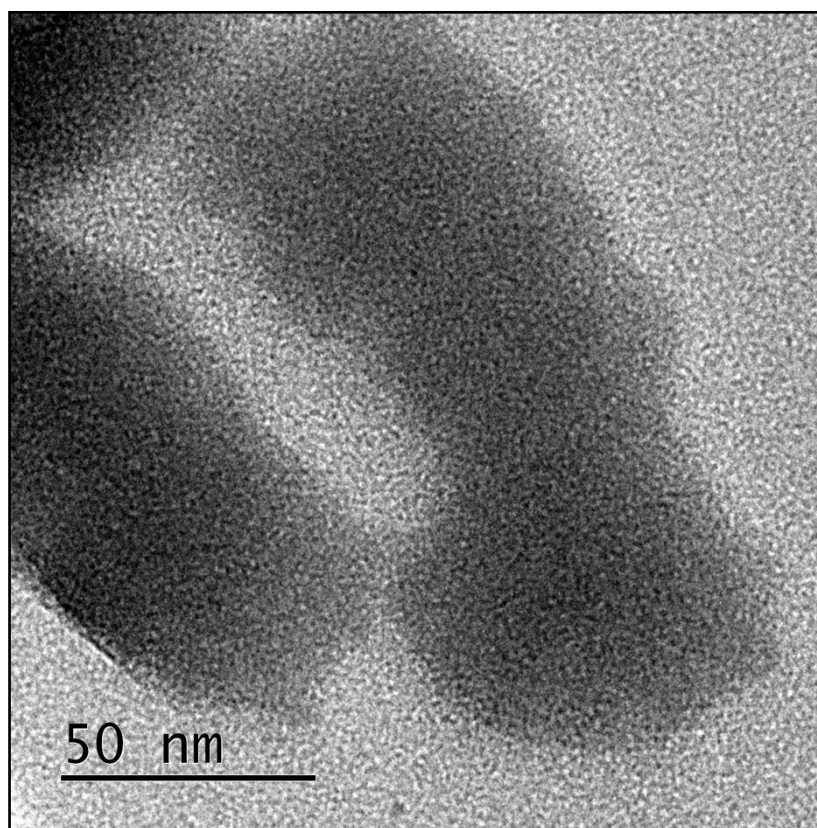

Fig S5: TEM images of ultramicrotome TPU sample where the scale bar is 50 nm.

## XRD and FT-IR spectra of the pristine and nanocomposite PU after treatment with enzyme

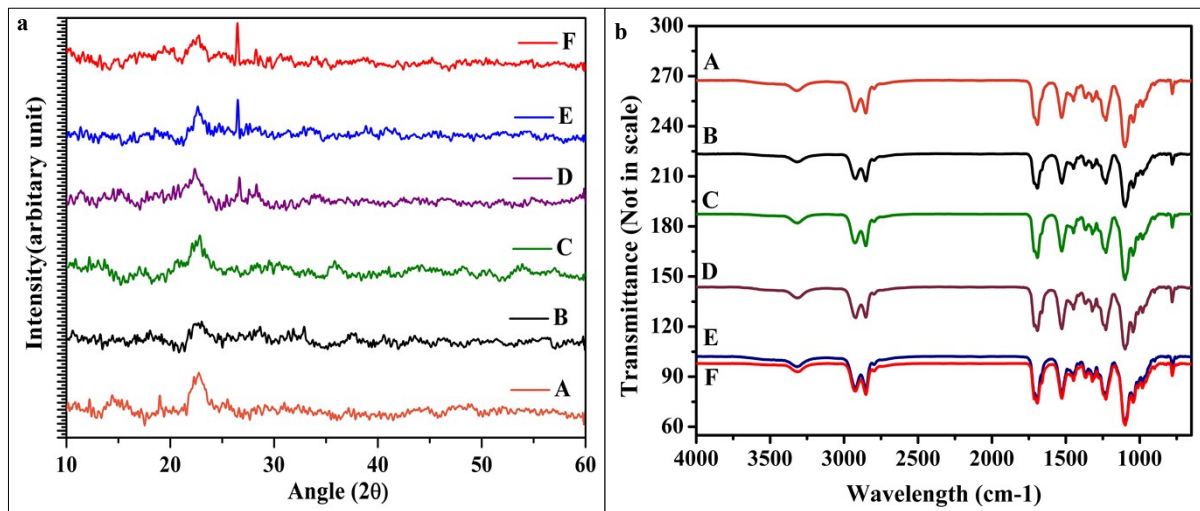

Fig S6: Figures a & b represent the XRD and FT-IR spectra of the starting PU (A) and after treatment with enzyme for 48 hrs. of PU (B), PU with 1 wt% reinforced CNP (C), CNT (D), graphene (E) and 3D hierarchical geometries (F) respectively.

### BET N<sub>2</sub> adsorption isotherms

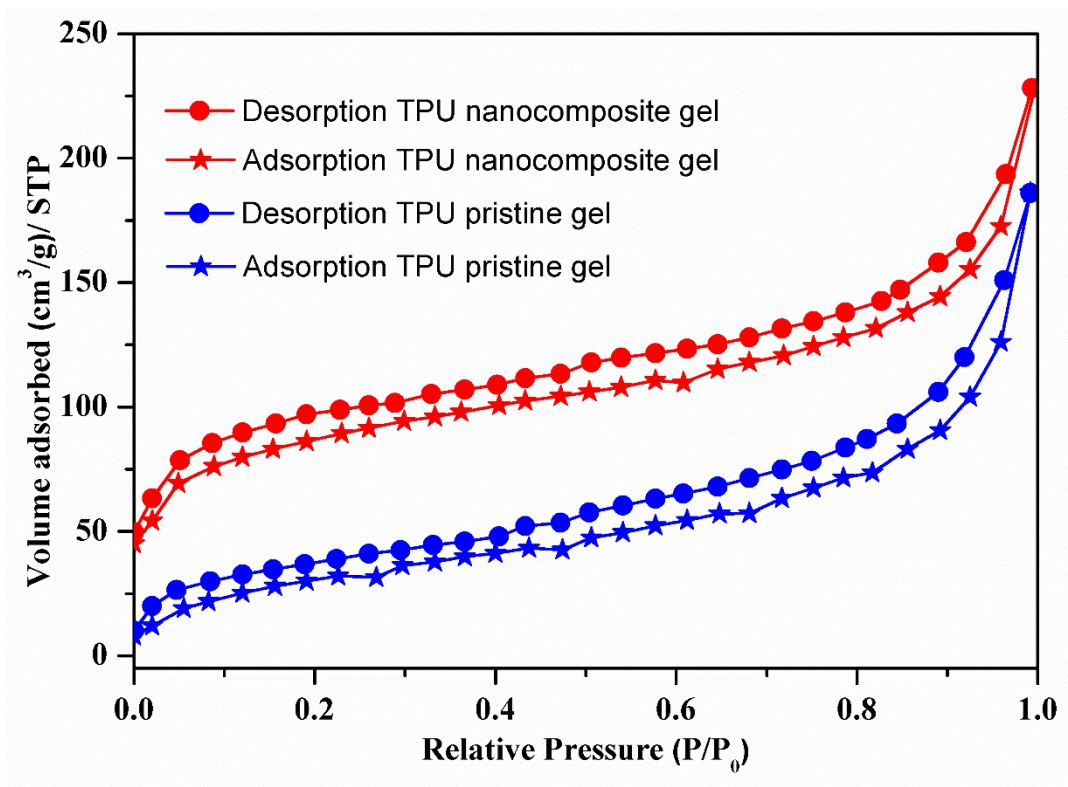

Fig S7: The comparative N<sub>2</sub> adsorption and desorption isotherm for TPU pristine gel (blue stars and blue circles respectively) and nanocomposite TPU gel with 1 wt% addition of hybrid nanofillers (red stars and blue circles respectively) are represented.

### Zeta potentials for isoelectric points of functionalized nanomaterials

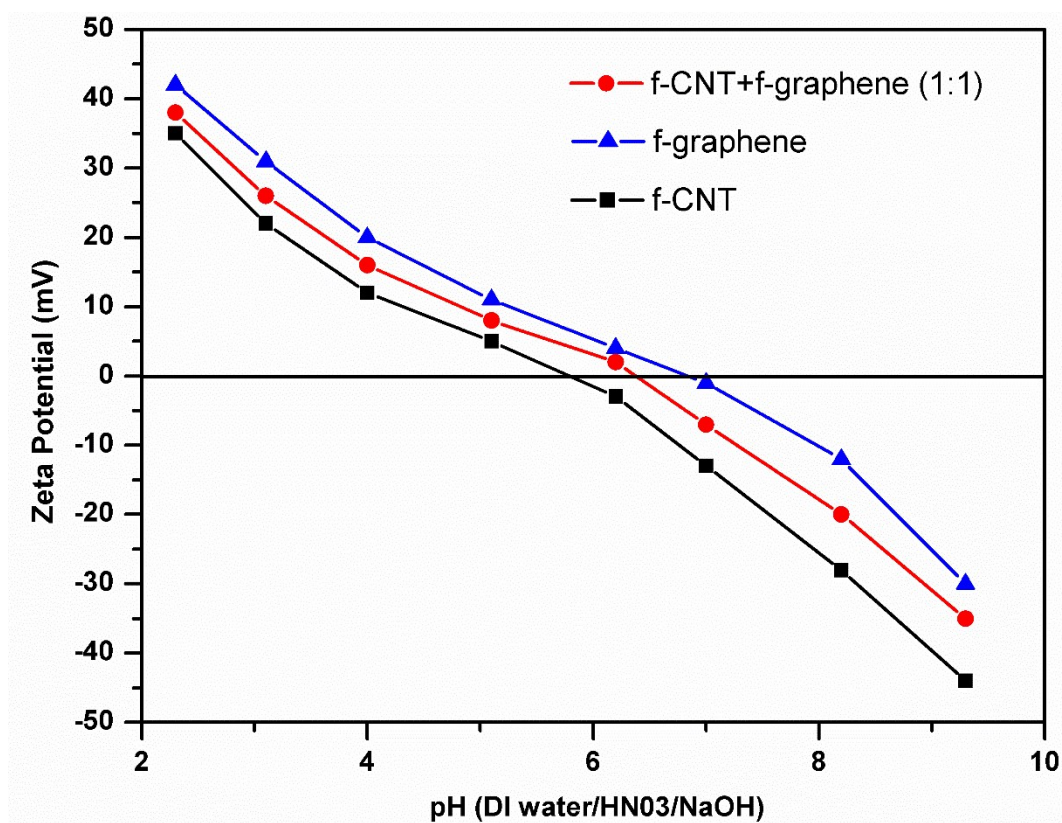

Fig S8: The point of zero charge of acid functionalized MWCNTs (black diamonds), hydroxylated graphenes (blue triangles) and f-MWCNTs embedded in to graphene flakes (1:1) (red circles) were measured by zeta potentials as a function of pH.



## Fluorescence intensities with time at low concentration of different metal ions

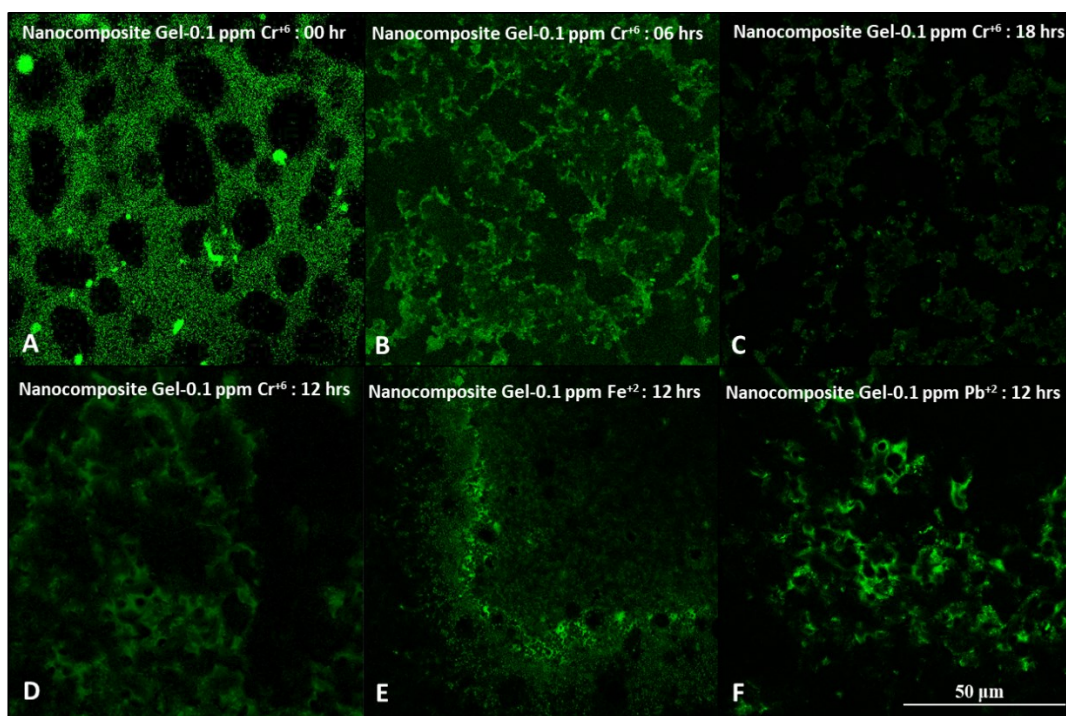

Fig S9: Fluorescence images of TPU nanocomposite gel before (A) and after treatment of 0.1 ppm chromium ions for 06 hrs (B), 12hrs (D) and 18hrs (C). The treatment of 0.1 ppm iron (E) and lead (F) ions on TPU nanocomposite gels for 12hrs are represented. The samples were dried and fixed on a glass slide with a drop of epoxy glue and viewed under an epi-fluorescence microscope by excitation at 488 nm where the scale bar is 50  $\mu\text{m}$ .

## UV-VIS intensities with wavelengths of different functionalized carbon nanomaterials

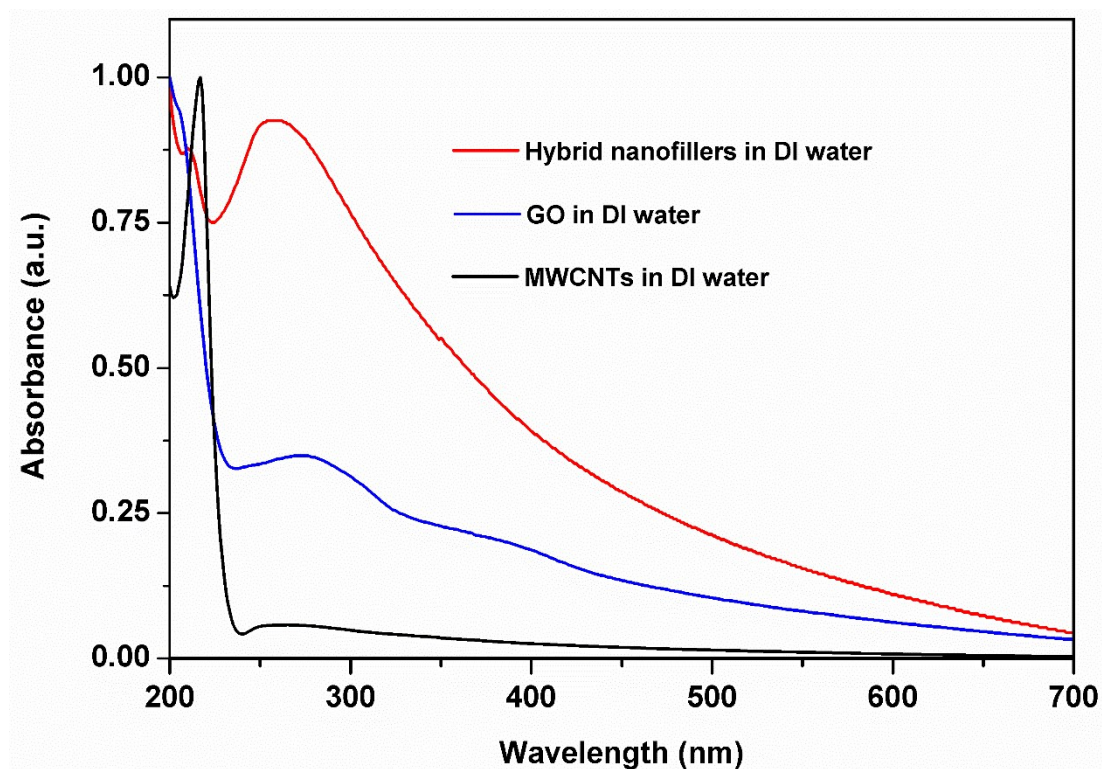

Fig S10: UV-VIS absorbance of acid functionalized MWCNTs (black line), hydroxylated graphenes (blue line) and f-MWCNTs embedded in to graphene flakes (1:1) (red line) were measured as a function of wavelength at 0.01 mg/ml concentration in DI water.
